# Supplementary material
Source: Copernicus journal article supplement (doi:10.5194/egusphere-2026-1079)
Supplement: Supplementary file [file egusphere-2026-1079-AC1-supplement.pdf]

We organize this Response to Reviewers document in the following way. Reviewers' comments are numbered as RxCy, where X is the reviewer number, and Y is the reviewer's comment number. Our responses are reported in blue, and new or modified text highlighted in *italics red*.

## Reviewer 1 Comments and Responses

### General Comments

**R1C1:** The given paper studies how bias of simulated extreme precipitation, from both convection permitting models (CPM) and their driving regional climate models, changes with spatial and temporal aggregation over complex terrain. It thereby constitutes an important addition to the current scope of literature, where CPM evaluation is commonly performed at the native resolution only. While added value at high resolution has been proven throughout a variety of studies, it remained unexplored how this improvement in model performance reflects at areal aggregation of up to several thousands of kilometers and at temporal aggregation of up to 24 h. Such scales are however highly relevant for hydrological modelling in large river basins and of long-duration flood drivers. Given the high computational demand of CPMs, knowledge on how and whether added value of CPMs reflects at higher areal and temporal scales is of high practical relevance. A better understanding of the performance of CPMs, such as potential changes in the sign and magnitude of model bias with aggregation, furthermore pinpoints to physical inconsistencies in the current climate models and thereby supports model development. In conclusion, the presented paper bridges an important research gap, is of direct practical relevance and advances our understanding of CPM performance. It is therefore greatly welcomed as a contribution to HESS. The paper is well structured, presents the findings in a clear and concise manner and is of high scientific quality. The current version of the manuscript would benefit from a sharper contextualisation and a more in-depth discussion on the scales of hydrological processes and their importance in the generation of different flood types through a revision of its introduction, as outlined below. The methodology section leaves a few open questions, which are addressed in the following. The results and their discussion are of high quality, with some rather technical revisions needed before publication.

**Response:** We thank you sincerely for the thoughtful evaluation of our work and your constructive suggestions, whose implementation has strengthened the manuscript. We have addressed each of your comments and provide our responses below.

### Specific Comments

**R1C2:** P. 1/ L. 17: It would be relevant to mention over which study area you're conducting the analyses, namely over Switzerland, as it gives the reader an idea of the physiography at hand.

**Response:** We agree and included a note on the study domain, that is Switzerland, in the opening of the abstract. *"Here, we assess how well CPM simulations represent areal precipitation extremes over Switzerland across durations from 1 to 24 h and spatial scales from ~10 to 5000 km<sup>2</sup>."*

**R1C3:** P. 1/ L. 20: The information of the length of the used time series could be useful, as it is a proxy for the robustness of the results (20 years).

**Response:** We agree and have mentioned the record length of the observational reference in the abstract. *"We use 20 years (2005–2024) of hourly precipitation from Switzerland's high-resolution radar–gauge product as a reference..."*

**R1C4:** P. 1/ L. 23: With only the abstract, it is not clear what the exact coefficient is that is under-/ overestimated (it is the 20-y extreme precipitation return level).

**Response:** Thanks, we have clarified this in the abstract. *"For 1–3 h extremes, CPM bias in 20-year return levels strongly depends on the spatial scale, shifting from a ~15% underestimation at native resolution to near-zero bias at ~400 km<sup>2</sup> and to ~20% overestimation at ~4000 km<sup>2</sup>."*

**R1C5:** P. 24/ L. 24: The statement is given that: „RCMs consistently underestimate precipitation extremes across all spatial scales“. The RCMs' bias is not quantified in the abstract, yet at the end (L. 27) it is concluded that CPMs outperform the RCMs for short-duration extremes. It would be helpful to underline this statement with a number for the RCMs' bias. This allows the reader to follow the conclusion and gain an estimate of the degree of added value by CPMs.

**Response:** Thanks for pointing this out, now we have explicitly mentioned the RCMs' bias with corresponding numbers. *"RCMs consistently underestimate 20-year return levels across all spatial scales, with biases ranging from ~40% underestimation at native resolution (~144 km<sup>2</sup>) to ~10% underestimation at the largest aggregation scales (~5000 km<sup>2</sup>)."*

**R1C6:** P. 1/ L. 28: This statement could be refined by specifying for which catchments and flood types in particular scale-dependent biases are of major importance.

**Response:** We have refined the statement as: *"Overall, CPMs offer important added value for representing short-duration extremes relevant to flash floods and debris flows in small to medium-size Alpine catchments (10–10<sup>3</sup> km<sup>2</sup>), but scale-dependent biases must be accounted for when translating CPM outputs into flood-risk assessments at these scales."*

**R1C7:** P. 2 / L. 32: One important parameter for flood generation, modified by spatial averaging, is indeed extreme precipitation intensity. However, it is not the only one, with precipitation volume also being a defining factor. This aspect could be mentioned here.

**Response:** We have added the aspect regarding the effect of precipitation volume on flood generation to the end of the opening paragraph in the Introduction. The new sentence reads as: *"Across these scales, both the intensity of extreme precipitation and the total precipitation volume accumulated over the catchment shape the flood response, with their relative importance depending on catchment size, storm duration, and antecedent conditions (Viglione and Blöschl, 2009)."*

**R1C8:** P. 2/ L. 34 f.: The given statement does not only apply to complex terrain, but is valid universally. However, there is indeed great value in conducting the analyses over mountainous terrain, as you highlight in L. 82 ff. In the introduction, you could elaborate more deeply on what's special in complex terrain and why your works finds particular relevance here.

Response: We have modified the opening paragraph in the Introduction to elaborate more on the relevance of complex topography in this context. The paragraph now reads as: *"A defining characteristic of extreme precipitation is its inherent space and time scale dependence. Extremes measured at a point location differ systematically from extremes averaged over a catchment area, and as the spatial averaging scale increases, extreme precipitation intensities generally decrease. The rate of this reduction depends on storm type, storm organization, and terrain complexity (Breinl et al., 2020; De Michele et al., 2001; Gericke and Pietersen, 2020; Svensson and Jones, 2010). While these scaling relationships apply universally, they are particularly pronounced in regions of complex terrain, where orographic effect, and sharp climatic gradients across mountain ranges produce strong spatial heterogeneity in storm structure. In such regions, the spatial scales relevant for flood hydrology span several orders of magnitude, from a few square kilometers in small Alpine or urban catchments to several thousand square kilometers in large river basins. Across these scales, both the intensity of extreme precipitation and the total precipitation volume accumulated over the catchment shape the flood response, with their relative importance depending on catchment size, storm duration, and antecedent conditions (Viglione and Blöschl, 2009)."*

**R1C9:** P: 2/ L. 52 f. & L. 58: A more in-depth discussion on the scales of hydrological processes and their importance in the generation of different flood types, in conjunction with the meteorological scales would be needed. CPMs are known to offer added value for the representation of small-scale heavy summer storms, with Hortonian overland flow being a major driver of resulting flash floods in fast responding catchments. Over longer time scales and larger catchments with longer response times, long-duration flood drivers take the lead, with saturation-excess overland flow being a major player. A discussion on how flood drivers change with scale and where CPMs are expected to offer added value for hydrological impact modelling, would be very valuable. Conclusionary, the types of catchments and floods for which the work presented here has primary relevance can be refined (c.f. comment to P. 1/ L. 28).

Response: Thanks for this suggestion. We have expanded the introduction to clarify how flood-generating mechanisms differ across catchment scales and durations, and where CPMs are expected to add value for hydrological impact modelling. This led to the modification of the entire fourth paragraph of the Introduction, which now reads as follows:

*"Despite the growing evidence that CPMs improve sub-daily precipitation statistics (Estermann et al., 2025; Fosser et al., 2024; Lucas-Picher et al., 2024), most evaluation studies still emphasize grid-point metrics and station-based comparisons, while hydrological applications typically require areal precipitation over scales spanning up to several thousands of square kilometers (Rasmussen et al., 2012). The relevance of potential improvements obtained by using CPMs instead of coarser resolution climate data for flood hazard applications depends strongly on the flood type and catchment scale considered. In small, fast-responding Alpine catchments, flash floods and debris flows are typically driven by short-duration, high-intensity convective precipitation, with characteristic response times of a few hours (Borga et al., 2014; Marchi et al., 2010). For these flood types, the spatial organization and intensity of hourly precipitation extremes — which CPMs explicitly resolve — directly control flood magnitude and*

*timing. As catchment size increases, response times lengthen and flood-generating precipitation durations shift toward sub-daily to multi-day accumulations, with saturation-excess processes and antecedent soil moisture playing a more important role (Viglione and Blöschl, 2009). For these flood types, large-scale synoptic forcing dominates the precipitation mechanism, and the added value of explicitly resolving convection may be less critical. However, it is still not well known how CPM skill in reproducing precipitation extremes changes with areal aggregation, nor whether CPMs and their driving regional climate models (RCMs) behave differently under the same spatial averaging. Clarifying these scale-dependent behaviours is necessary if CPMs are to be used confidently for analysing climate change impacts on flood hazard. At the same time, CPM simulations remain computationally demanding (Ban et al., 2021; Schär et al., 2020), and it is important to understand at which spatial and temporal scales they provide clear practical benefits over RCMs (Kendon et al., 2021; Lucas-Picher et al., 2024)."*

**R1C10:** P. 2/ L. 60: Without having read the study, it is ambiguous whether the „spatial and temporal scales“ mentioned refer to scales of modelling or aggregation. I would hence suggest rewriting this sentence.

**Response:** We have rephrased the sentence to make it explicit that we refer to aggregation scales. *"This study sheds light on the dependence of climate model biases on spatial and temporal aggregation scales by evaluating how well a multi-model CPM ensemble from the CORDEX-FPS framework represents precipitation extremes..."*

**R1C11:** P. 3/ L. 66: A specification which types of biases are quantified would make it clearer for the reader. Furthermore, the term of “event duration” might be misleading, since it refers to the temporal aggregation window, not however to the duration of the studied rainfall events.

**Response:** We have clarified these terms in the study objectives by replacing "event duration" with "precipitation accumulation duration" and specifying that biases refer to extreme precipitation return levels. *"In particular, we (i) assess how spatial patterns and the magnitudes of extreme precipitation return levels change from the native grid spacing to aggregated areas, (ii) quantify how CPM and RCM biases in extreme precipitation return levels depend on precipitation accumulation duration and spatial aggregation, and (iii) assess why these biases change with spatial scale."*

**R1C12:** P. 5/ L. 106: Is there any quantification of the uncertainties of CombiPrecip available? Such work has e.g. been done for the radar-based, gauge-adjusted quantitative precipitation estimates over neighbouring Germany (RADOLAN; Kreklow et al., 2020). If the uncertainties of CombiPrecip are known, this would be valuable information to be added.

**Response:** Thanks for your suggestion on including information regarding the uncertainty of CombiPrecip in Section 2.2.1. In fact, uncertainty in CombiPrecip has been quantified in several studies, which we now reference explicitly in Section 2.2.1. In response to this comment we have added the following short description:

*"It is important to note that MeteoSwiss also provides a radar-only precipitation product. For the purpose of our study, CombiPrecip offers a pragmatic compromise between spatial detail and bias control, combining the spatial information of the radar mosaic with gauge-based*

*adjustment at the ground. Cross-validation against rain gauges shows that this merging reduces the quantitative error of the radar-only product by approximately 40% at hourly aggregation (Barton et al., 2020). Residual errors in CombiPrecip nonetheless vary systematically with altitude, with bias becoming increasingly negative at higher elevations (Ghaemi et al., 2023), and agreement with gauge observations for extreme precipitation decreases with increasing event severity (Panziera et al., 2018)."*

**R1C13:** P. 6/ L. 152: Here you could add a note that 20 years is too short for a robust climatological analysis.

**Response:** We have added a sentence on the relatively short length of the time series for a robust climatological analysis:

*"We note that the observational reference period available from CombiPrecip (2005–2024) does not overlap with the CPM historical decade (1996–2005). This mismatch is unavoidable given the start date of the radar–gauge record. We also acknowledge that a 20-year observational record and a 10-year simulation are relatively short for robust climatological analysis of extremes, particularly when considering long return periods. This, however, motivates our use of the non-asymptotic SMEV approach (Section 2.3.3)."*

**R1C14:** P. 8/ L. 178: Areal mean precipitation time series are not only constructed for the climate models but also for the observations, right?

**Response:** Yes, the same procedure is applied to the observations. We have now clarified this in Section 2.3.2.

*"For OBS, CPMs, and RCMs alike, we derive areal mean precipitation time series using a sliding, square window centered on each grid cell (see Fig. 1c)."*

**R1C15:** P. 8/ L. 179: This sentence only becomes clear later on, as here it is ambiguous whether e.g. a window size of 4 is a window with 4 pixels or a window with 4 x 4 pixels. I suggest rephrasing it.

**Response:** We agree that the original phrasing was ambiguous. We have rephrased the window-size definition to make it more explicit.

*"For the OBS and CPM models, window sizes include side lengths  $g \in \{1, 2, 3, 4, 5, 6, 7, 9, 11, 13, 15, 17, 19, 21\}$  pixels, corresponding to  $g \times g$  pixel windows yielding effective areas from  $A \approx 9$  up to  $A \approx 3969$  km<sup>2</sup>. For the RCM models, given their coarser native resolution, the analysis spans side lengths  $g \in \{1, 2, 3, 4, 5, 6\}$  pixels ( $g \times g$  windows), corresponding to effective areas from  $A \approx 144$  up to  $A \approx 5184$  km<sup>2</sup>."*

**R1C16:** P. 9/ Eq. 3: The given formula suggests that in the computation of the bias,  $g$  is the same number for the RCMs and the observations. With the RCMs at 12 km resolution and the observations at 3 km resolution, as an example  $g = 3$  would mean an effective area of 1296 km<sup>2</sup> for the RCMs, but of 81 km<sup>2</sup> for the observations. In keeping, it is not entirely clear, how the metrics are computed e.g. in Fig. 2 f). The question arises whether the RCMs median at 1296 km<sup>2</sup> is compared to the observations at 1089 km<sup>2</sup> or at 81 km<sup>2</sup> (see preceding

comment). A reformulation and some more information regarding the computation of the bias would help clarify this.

Response: Thanks for pointing out the need for clarification. The bias was computed by matching the closest effective areas (in km<sup>2</sup>) and not by matching g values across datasets (for CPM-to-OBS, they are the same on both g value and corresponding effective area). We have rewritten Eq. 3 and the surrounding text to make this more explicit and clearer. This yielded the following modifications:

- A) *“Return levels  $I_{i,A}^{(D)}(T)$  associated with a return period of  $T$ -years are determined by inverting the SMEV cumulative distribution function in Eq. 1, for each grid cell  $i$ , effective area  $A$ , and duration  $D$ .”*
- B) 
$$\text{Bias}_{i,A}^{(D)}(T) = \frac{I_{\text{Model},i,A}^{(D)}(T)}{I_{\text{OBS},i,A}^{(D)}(T)}$$
- C) *“where  $I_{\text{Model},i,A}^{(D)}(T)$  is the ensemble-median and individual-member CPM/RCM return levels, and  $I_{\text{OBS},i,A}^{(D)}(T)$  is the CombiPrecip (OBS) estimate for grid cell  $i$ , effective area  $A$  and duration  $D$  respectively. Biases are always computed at matched effective areas, however, for the RCMs this means comparing each RCM aggregation window against the OBS aggregation window whose effective area is closest to the RCM’s.”*

**R1C17:** P. 10/ L. 236 f.: At what spatial resolution is the partitioning into elevation groups being performed?

Response: The elevation grouping is performed at each spatial aggregation scale separately, with the elevation of each grid cell defined as the median elevation within its  $g \times g$  window. This ensures that the elevation classification is consistent with the spatial scale at which the precipitation field is aggregated. Also, similarly for the catchment-based analysis, each catchment is assigned its median elevation, as already indicated in the caption of Fig. 7 (Fig. 8 in revised version). We have updated the corresponding text in Section 2.3.4 to make this explanation more explicit.

*“For the elevation-based analysis, we partition the domain into three elevation groups with approximately an equal number of grid cells: G1 (259–1000 m), G2 (1000–1700 m), and G3 (1700–3612 m). The elevation assigned to each grid cell depends on the spatial aggregation scale considered: for a window size  $g$ , each cell is assigned the median elevation within its  $g \times g$  window, so that the elevation classification is consistent with the spatial scale at which the precipitation field is aggregated.”*

**R1C18:** P. 11/ Fig. 2 & P. 12/ Fig. 3: You have chosen to juxtapose the observations and CPMs with an 11 x 11 window (1089 km<sup>2</sup>) to the RCMs with a 3 x 3 window (1296 km<sup>2</sup>). What favored this choice against an 12 x 12 window for the observations and CPMs (which would have given an equal effective area of 1296 km<sup>2</sup> for all sets)?

Response: We appreciate the question. The choice of aggregation scales for the spatial-pattern figures (Figs. 2–6 in revised version) was motivated by visualisation rather than by equal area constraints between the OBS/CPM and RCM panels. We selected two scales: (i) the smallest scale for each dataset in our analysis ( $\approx 9$  km<sup>2</sup> for OBS/CPMs,  $\approx 144$  km<sup>2</sup> for RCMs), and (ii) an intermediate scale of an order of  $10^3$  km<sup>2</sup>, representative of small-to-medium sized

Alpine catchments. This range has been used in previous studies as well (Marchi et al., 2010; Reszler et al., 2018). The full spatiotemporal scale dependence of biases is examined in Figs. 6 and 7 (7 and 8 in the revised version) across the entire range up to several thousand km<sup>2</sup>. Given this target scale and the discrete window sizes we used in our analysis, the closest  $g \times g$  windows to  $\sim 1000$  km<sup>2</sup> were  $11 \times 11$  ( $\approx 1089$  km<sup>2</sup>) for the OBS/CPMs and  $3 \times 3$  ( $\approx 1296$  km<sup>2</sup>) for the RCMs.

In general, we aimed for odd number window sizes in our analysis for its simplicity and for the symmetry that it provides around the central cell. Also, given the volume of data we didn't want to include all subsequent  $g$  values. We did, however, include some even  $g$  values for the smallest areas ( $g = 2, 4, 6$ ) just in order to have smoother curves at these smaller areas.

**R1C19:** P. 15/ L. 305: I suggest changing the word „strong“, as it suggests higher magnitudes of bias, which are not visible from the plot. It only becomes clear that the heavy underestimation is more widespread, but not necessarily more pronounced.

Response: We agree and have rephrased to reflect the spatial extent rather than the magnitude. *“The driving RCMs show a more spatially extensive and uniform underestimation ( $\leq 0.6$ ) for 1h-20y extreme precipitation at  $\approx 144$  km<sup>2</sup> ...”*

**R1C20:** P. 16/ L. 322: A specification that it is the CPM ensemble median which shows near-zero bias would be recommended, given the large member spread.

Response: Actually, the term “CPMs/RCMs” there and everywhere else in the text refers to the ensemble median of models. We now make this more explicit in Section 2.3 line 162, where we introduce the abbreviations: *“For brevity, we denote the observation product as OBS (CombiPrecip) and the model ensemble median as CPMs/RCMs.”*

**R1C21:** P. 16/ L. 341: The statement is given that mid elevations show mild overestimation of 20-y return levels by CPMs at both 1-h and 24-h durations. While this is true across all scales at 24-h durations, however at 1-h durations, the bias only grows beyond 1 for areas above 1000 km<sup>2</sup>. This could be clarified.

Response: We agree and have refined the description. Also, as per R2C7 we have integrated Fig S6 into Fig 7 (Fig. 8 in revised version) that resulted in the revision of the corresponding paragraph. Please refer to the text and figure in R2C7.

**R1C22:** P. 20/ L. 400: Please present Fig. S8 in the results section as well. In the current version of the manuscript, it is referred to for the first time in the discussion.

Response: Thanks for your suggestion. We have moved Figure S8 (areal reduction factor) into the main text as Fig. 10, in Section 3.4, as also suggested by Reviewer 2. A short paragraph introducing the ARF results has been added to Section 3.4, and the brief description of the ARF in Section 2.3.5 has been slightly expanded. The overall revision in the manuscript reads as follows:

- A) Section 2.3.5: *“In addition to this analysis, an areal reduction factor is calculated across the datasets for the estimated return levels, which summarizes the rate at which the intensity of extreme precipitation decreases with increasing area.*

$$ARF_{i,A}^{(D)}(T) = \frac{I_{i,A}^{(D)}(T)}{I_{i,A_{min}}^{(D)}(T)} \quad (5)$$

Where for each datasets,  $I_{i,A}^{(D)}(T)$  is the estimated return level at grid cell  $i$ , effective area  $A$  and duration  $D$  respectively, and  $I_{i,A_{min}}^{(D)}(T)$  is the estimated return level at grid cell  $i$ , and duration  $D$  for the smallest area  $A_{min}$ ."

- B) Section 3.4 opening paragraph: "To better explain the spatiotemporal scale dependence of the biases identified in our results, we examine two complementary quantities: (i) the evolution of the within-window coefficient of variation (CV) of annual maximum precipitation with increasing area, which quantifies how spatial heterogeneity changes with aggregation; and (ii) the areal reduction factor (ARF) of extreme return levels, which summarizes how the intensity of estimated return levels decreases as the averaging area increases."
- C) Section 3.4 new paragraph: "The areal reduction factor for the 20-year return level provides a complementary view (Fig. 10). At 1-h duration (Fig. 10a), OBS shows the most rapid intensity decay with area, reaching ARF values near 0.35 at the largest aggregation scales. The CPM ensemble median decays more slowly than OBS, and individual CPMs span a band above the OBS curve, indicating that simulated 1-h extremes are more spatially coherent than observed ones. The RCM ensemble median exhibits an essentially parallel rate of decay to the CPM ensemble median over the range of common areal scales (above 144 Km<sup>2</sup>), but is shifted toward larger areas because of the coarser RCM native grid. At 24-h duration (Fig. 10b), the three datasets decay at very similar rates, with OBS and the CPM ensemble median essentially overlapping; the RCM ensemble median just shifted to the right due to its resolution but follows a similar slope."
- D) Figure 10 (previously Fig S8) added to the main results section of manuscript:

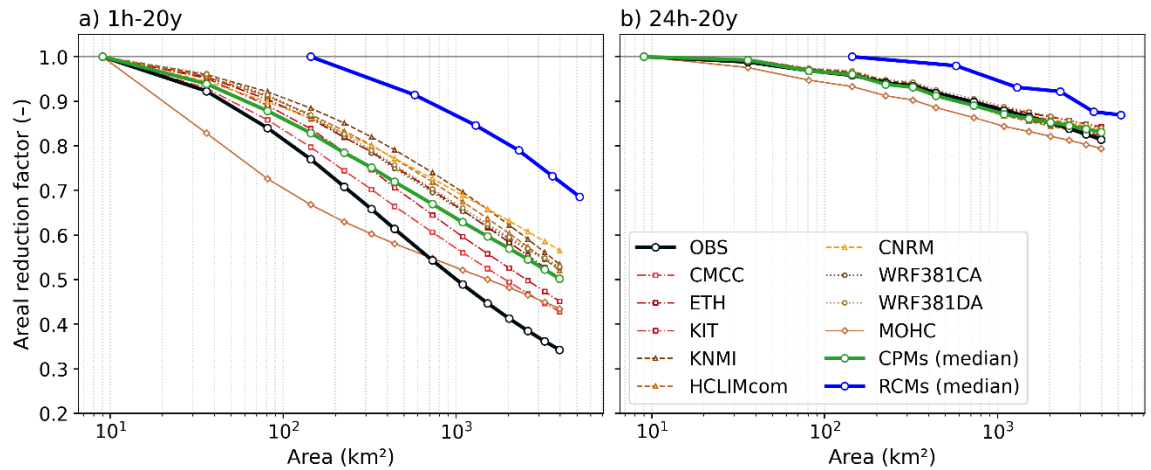

"Figure 10: Areal reduction factor (ARF) for 20-year extreme precipitation return levels as a function of areal extent, for (a) 1h and (b) 24h durations. ARF is defined as the ratio of the estimated areal extreme return level at area  $A$  to the corresponding return level at the native grid scale, normalised to unity at the smallest scale of each dataset. The black line shows CombiPrecip (OBS), thin coloured lines show individual CPM

*simulations, and the thick green and blue lines show the CPM and RCM ensemble medians, respectively."*

**R1C23:** P. 22/ L. 476: A few studies have included analyses on the scale dependence of convection parameterizing RCM bias, e.g. Prein et al. (2016) and Fantini et al. (2018). The study presented here does so for the first time for CPMs. I suggest making this distinction.

**Response:** Thanks for the suggestion. We have modified the statement as: *"Overall, while previous studies have examined scale-dependence biases in convection-parameterizing RCMs (Prein et al., 2016; Fantini et al., 2018), this study is the first to explore the scale-dependent performance of convection-permitting climate models, demonstrating the added value of CPMs over their driving RCMs in representing short-duration extremes at hydrologically relevant scales."*

### Technical Corrections

**R1C24:** P. 2/ L. 44: The abbreviation CPMs has already been given in L. 42.

**Response:** Corrected. In the subsequent sentence, only the abbreviation is used.

**R1C25:** P. 3/ L. 85: Based on the map given in Fig. 1, Ticino would be situated in the Southern Alps, rather than in the south of the climatological region of the Alps. If this is correct, I would suggest capitalising the S (i.e. „the Southern Alps“, rather than „the southern Alps“).

**Response:** We agree and have capitalized "Southern Alps" throughout the manuscript where it refers to the physiographic region.

**R1C26:** P. 7/ Table 1: „WRF3.8.1DA (12km)“ and „HadGEM3 (25km)“ both need a space between the number and the unit.

**Response:** Corrected in Table 1: "12 km" and "25 km".

**R1C27:** P. 9/ L. 233: mean Bias → mean bias

**Response:** Corrected.

**R1C28:** P. 13/ L. 271: The observations at the smallest spatial scale are shown in Fig. 3a not in Fig. 3c.

**Response:** Corrected.

**R1C29:** P. 15/ L. 301 & Appendix/ Fig. S4: The native resolution RCM resolution is of approximately 144 km<sup>2</sup>, not of 114 km<sup>2</sup>.

**Response:** Corrected.

**R1C30:** P. 15/ L. 302: An area of 1296 km<sup>2</sup> equals to 3x3 RCM grids, not 6x6 grids.

**Response:** Corrected.

**R1C31:** P. 15/ L. 310: The abbreviation mAM is not used in the plots, rather „mean AM“ is used.

**Response:** Corrected.

**R1C32:** P. 16/ L. 328: In the manuscript text, the reference to Fig. S7 comes before any reference to Fig. S5 and Fig. S6.

**Response:** We have reordered the supplementary figures so that they are referenced in numerical order.

**R1C33:** P. 19/ Fig. 8 & Appendix/ Fig. S1, S2, S3, S4, S7: I suggest including the abbreviation (AM) into the respective figure captions or into the main text.

**Response:** We have added the "AM" definition to the relevant figure captions and in the main text upon first use.

**R1C34:** P. 22/ L. 462: There is a spare point here.

**Response:** Corrected.

## References

Ban, N., Caillaud, C., Coppola, E., Pichelli, E., Sobolowski, S., Adinolfi, M., Ahrens, B., Alias, A., Anders, I., Bastin, S., Belušić, D., Berthou, S., Brisson, E., Cardoso, R. M., Chan, S. C., Christensen, O. B., Fernández, J., Fita, L., Frisius, T., Gašparac, G., Giorgi, F., Goergen, K., Haugen, J. E., Hodnebrog, Ø., Kartsios, S., Katragkou, E., Kendon, E. J., Keuler, K., Lavin-Gullon, A., Lenderink, G., Leutwyler, D., Lorenz, T., Maraun, D., Mercogliano, P., Milovac, J., Panitz, H.-J., Raffa, M., Remedio, A. R., Schär, C., Soares, P. M. M., Srnec, L., Steensen, B. M., Stocchi, P., Tölle, M. H., Truhetz, H., Vergara-Temprado, J., De Vries, H., Warrach-Sagi, K., Wulfmeyer, V., and Zander, M. J.: The first multi-model ensemble of regional climate simulations at kilometer-scale resolution, part I: evaluation of precipitation, *Clim. Dyn.*, 57, 275–302, <https://doi.org/10.1007/s00382-021-05708-w>, 2021.

Barton, Y., Sideris, I. V., Raupach, T. H., Gabella, M., Germann, U., and Martius, O.: A multi-year assessment of sub-hourly gridded precipitation for Switzerland based on a blended radar—Rain-gauge dataset, *Int. J. Climatol.*, 40, 5208–5222, <https://doi.org/10.1002/joc.6514>, 2020.

Borga, M., Stoffel, M., Marchi, L., Marra, F., and Jakob, M.: Hydrogeomorphic response to extreme rainfall in headwater systems: Flash floods and debris flows, *J. Hydrol.*, 518, 194–205, <https://doi.org/10.1016/j.jhydrol.2014.05.022>, 2014.

Breinl, K., Müller-Thomy, H., and Blöschl, G.: Space–Time Characteristics of Areal Reduction Factors and Rainfall Processes, *J. Hydrometeorol.*, 21, 671–689, <https://doi.org/10.1175/JHM-D-19-0228.1>, 2020.

De Michele, C., Kottegoda, N. T., and Rosso, R.: The derivation of areal reduction factor of storm rainfall from its scaling properties, *Water Resour. Res.*, 37, 3247–3252, <https://doi.org/10.1029/2001WR000346>, 2001.

Estermann, R., Rajczak, J., Velasquez, P., Lorenz, R., and Schär, C.: Projections of Heavy Precipitation Characteristics Over the Greater Alpine Region Using a Kilometer–Scale Climate Model Ensemble, *J. Geophys. Res. Atmospheres*, 130, e2024JD040901, <https://doi.org/10.1029/2024JD040901>, 2025.

Fantini, A., Raffaele, F., Torma, C., Bacer, S., Coppola, E., Giorgi, F., Ahrens, B., Dubois, C., Sanchez, E., and Verdecchia, M.: Assessment of multiple daily precipitation statistics in ERA-Interim driven Med-CORDEX and EURO-CORDEX experiments against high resolution observations, *Clim. Dyn.*, 51, 877–900, <https://doi.org/10.1007/s00382-016-3453-4>, 2018.

Fosser, G., Gaetani, M., Kendon, E. J., Adinolfi, M., Ban, N., Belušić, D., Caillaud, C., Careto, J. A. M., Coppola, E., Demory, M.-E., De Vries, H., Dobler, A., Feldmann, H., Goergen, K., Lenderink, G., Pichelli, E., Schär, C., Soares, P. M. M., Somot, S., and Tölle, M. H.: Convection-permitting climate models offer more certain extreme rainfall projections, *Npj Clim. Atmospheric Sci.*, 7, 51, <https://doi.org/10.1038/s41612-024-00600-w>, 2024.

Gericke, O. and Pietersen, J. P. J.: Estimation of areai reduction factors using daily rainfall data and a geographically centred approach, *J. South Afr. Inst. Civ. Eng.*, 62, 20–31, <https://doi.org/10.17159/2309-8775/2020/v62n4a3>, 2020.

Ghaemi, E., Gabella, M., Foelsche, U., Sideris, I., and Nerini, D.: The effect of altitude on the uncertainty of radar-based precipitation estimates over Switzerland, *Int. J. Remote Sens.*, 44, 2495–2517, <https://doi.org/10.1080/01431161.2023.2203339>, 2023.

Kendon, E. J., Prein, A. F., Senior, C. A., and Stirling, A.: Challenges and outlook for convection-permitting climate modelling, *Philos. Trans. R. Soc. Math. Phys. Eng. Sci.*, 379, 20190547, <https://doi.org/10.1098/rsta.2019.0547>, 2021.

Lucas-Picher, P., Brisson, E., Caillaud, C., Alias, A., Nabat, P., Lemonsu, A., Poncet, N., Cortés Hernandez, V. E., Michau, Y., Doury, A., Monteiro, D., and Somot, S.: Evaluation of the convection-permitting regional climate model CNRM-AROME41t1 over Northwestern Europe, *Clim. Dyn.*, 62, 4587–4615, <https://doi.org/10.1007/s00382-022-06637-y>, 2024.

Marchi, L., Borga, M., Preciso, E., and Gaume, E.: Characterisation of selected extreme flash floods in Europe and implications for flood risk management, *J. Hydrol.*, 394, 118–133, <https://doi.org/10.1016/j.jhydrol.2010.07.017>, 2010.

Panziera, L., Gabella, M., Germann, U., and Martius, O.: A 12-year radar-based climatology of daily and sub-daily extreme precipitation over the Swiss Alps, *Int. J. Climatol.*, 38, 3749–3769, <https://doi.org/10.1002/joc.5528>, 2018.

Prein, A. F., Gobiet, A., Truhetz, H., Keuler, K., Goergen, K., Teichmann, C., Fox Maule, C., Van Meijgaard, E., Déqué, M., Nikulin, G., Vautard, R., Colette, A., Kjellström, E., and Jacob, D.: Precipitation in the EURO-CORDEX  $0.11^{\circ}$  and  $0.44^{\circ}$  simulations: high resolution, high benefits?, *Clim. Dyn.*, 46, 383–412, <https://doi.org/10.1007/s00382-015-2589-y>, 2016.

Rasmussen, S. H., Christensen, J. H., Drews, M., Gochis, D. J., and Refsgaard, J. C.: Spatial-Scale Characteristics of Precipitation Simulated by Regional Climate Models and the Implications for Hydrological Modeling, *J. Hydrometeorol.*, 13, 1817–1835, <https://doi.org/10.1175/JHM-D-12-07.1>, 2012.

Reszler, C., Switanek, M. B., and Truhetz, H.: Convection-permitting regional climate simulations for representing floods in small- and medium-sized catchments in the Eastern

Alps, *Nat. Hazards Earth Syst. Sci.*, 18, 2653–2674, <https://doi.org/10.5194/nhess-18-2653-2018>, 2018.

Schär, C., Fuhrer, O., Arteaga, A., Ban, N., Charpiloz, C., Di Girolamo, S., Hentgen, L., Hoefler, T., Lapillonne, X., Leutwyler, D., Osterried, K., Panosetti, D., Rüdüsühli, S., Schlemmer, L., Schulthess, T. C., Sprenger, M., Ubbiali, S., and Wernli, H.: Kilometer-Scale Climate Models: Prospects and Challenges, *Bull. Am. Meteorol. Soc.*, 101, E567–E587, <https://doi.org/10.1175/BAMS-D-18-0167.1>, 2020.

Svensson, C. and Jones, D. A.: Review of methods for deriving areal reduction factors, *J. Flood Risk Manag.*, 3, 232–245, <https://doi.org/10.1111/j.1753-318X.2010.01075.x>, 2010.

Viglione, A. and Blöschl, G.: On the role of storm duration in the mapping of rainfall to flood return periods, *Hydrol. Earth Syst. Sci.*, 13, 205–216, <https://doi.org/10.5194/hess-13-205-2009>, 2009.
